# Supplementary material for: Cellulose-based hydrogel for adsorptive removal of cationic dyes from aqueous solution: isotherms and kinetics
Source: PubMed Central journal article supplement — RSC Adv. 2023 Feb 6;13(7):4757–74. doi: 10.1039/d2ra08283g (PMC9900603; doi:10.1039/d2ra08283g), 2023-02-06
Supplement: RA-013-D2RA08283G-s001.pdf [file RA-013-D2RA08283G-s001.pdf]

**SUPPLEMENTARY MATERIALS**

**Cellulose-based hydrogel for adsorptive removal of cationic dyes from aqueous solution: Isotherms and Kinetics**

Chidamparam Poornachandhra<sup>a</sup>, Rajamani M Jayabalakrishnan<sup>\*a</sup>, M Prasanthrajan<sup>a</sup>, Govindaraj Balasubramanian<sup>a</sup>,  
Arunachalam Lakshmanan<sup>b</sup>, S Selvakumar<sup>c</sup> and Joseph Ezra John<sup>a</sup>

<sup>a</sup>Department of Environmental Sciences, Tamil Nadu Agricultural University, India

<sup>b</sup>Department of Nano Science and Technology, Tamil Nadu Agricultural University, India

<sup>c</sup>Water Technology Centre, Tamil Nadu Agricultural University, India

\*Corresponding author e-mail: jayabalphd@gmail.com

**Supplementary Table 1.** ANOVA and coefficients model for the CV removal process

| Source             | Sum of Squares              | df                              | Mean Square                      | F-value                        | p-value  | Significant/<br>Non-significant |
|--------------------|-----------------------------|---------------------------------|----------------------------------|--------------------------------|----------|---------------------------------|
| <b>Model</b>       | 89.18                       | 14                              | 6.37                             | 85.19                          | < 0.0001 | S                               |
| A                  | 43.19                       | 1                               | 43.19                            | 577.57                         | < 0.0001 | S                               |
| B                  | 6.14                        | 1                               | 6.14                             | 82.12                          | < 0.0001 | S                               |
| C                  | 7.16                        | 1                               | 7.16                             | 95.80                          | < 0.0001 | S                               |
| D                  | 0.48                        | 1                               | 0.48                             | 6.40                           | 0.0299   | S                               |
| AB                 | 0.34                        | 1                               | 0.34                             | 4.56                           | 0.0585   | NS                              |
| AC                 | 0.99                        | 1                               | 0.99                             | 13.30                          | 0.0045   | S                               |
| AD                 | 0.00                        | 1                               | 0.00                             | 0.01                           | 0.9411   | NS                              |
| BC                 | 1.08                        | 1                               | 1.08                             | 14.41                          | 0.0035   | S                               |
| BD                 | 0.80                        | 1                               | 0.80                             | 10.69                          | 0.0084   | S                               |
| CD                 | 0.04                        | 1                               | 0.04                             | 0.53                           | 0.4826   | NS                              |
| A <sup>2</sup>     | 2.67                        | 1                               | 2.67                             | 35.75                          | 0.0001   | S                               |
| B <sup>2</sup>     | 0.03                        | 1                               | 0.03                             | 0.36                           | 0.5642   | NS                              |
| C <sup>2</sup>     | 1.42                        | 1                               | 1.42                             | 18.96                          | 0.0014   | S                               |
| D <sup>2</sup>     | 1.09                        | 1                               | 1.09                             | 14.62                          | 0.0034   | S                               |
| <b>Residual</b>    | 0.75                        | 10                              | 0.07                             |                                |          |                                 |
| Lack of Fit        | 0.24                        | 4                               | 0.06                             | 0.70                           | 0.6204   | NS                              |
| Pure Error         | 0.51                        | 6                               | 0.09                             |                                |          |                                 |
| <b>Cor Total</b>   | 89.93                       | 24                              |                                  |                                |          |                                 |
| <b>CV = 0.30 %</b> | <b>R<sup>2</sup> = 0.99</b> | <b>Adj R<sup>2</sup> = 0.98</b> | <b>Pred R<sup>2</sup> = 0.87</b> | <b>Adeq. Precision = 33.82</b> |          |                                 |

\*S-Significant; NS-Non-significant

**Supplementary Table 2.** ANOVA and coefficients model for the MB removal process

| Source             | Sum of Squares              | df                              | Mean Square                      | F-value                        | p-value  | Significant/ Non-significant |
|--------------------|-----------------------------|---------------------------------|----------------------------------|--------------------------------|----------|------------------------------|
| <b>Model</b>       | 534.03                      | 14                              | 38.14                            | 30.55                          | < 0.0001 | S                            |
| A                  | 60.60                       | 1                               | 60.60                            | 48.53                          | < 0.0001 | S                            |
| B                  | 28.27                       | 1                               | 28.27                            | 22.64                          | 0.0008   | S                            |
| C                  | 2.79                        | 1                               | 2.79                             | 2.24                           | 0.1655   | NS                           |
| D                  | 14.61                       | 1                               | 14.61                            | 11.70                          | 0.0065   | S                            |
| AB                 | 64.30                       | 1                               | 64.30                            | 51.50                          | < 0.0001 | S                            |
| AC                 | 29.92                       | 1                               | 29.92                            | 23.96                          | 0.0006   | S                            |
| AD                 | 8.00                        | 1                               | 8.00                             | 6.40                           | 0.0298   | S                            |
| BC                 | 63.52                       | 1                               | 63.52                            | 50.87                          | < 0.0001 | S                            |
| BD                 | 0.33                        | 1                               | 0.33                             | 0.26                           | 0.6206   | NS                           |
| CD                 | 0.01                        | 1                               | 0.01                             | 0.01                           | 0.9233   | NS                           |
| A <sup>2</sup>     | 4.24                        | 1                               | 4.24                             | 3.39                           | 0.0952   | NS                           |
| B <sup>2</sup>     | 24.66                       | 1                               | 24.66                            | 19.75                          | 0.0012   | S                            |
| C <sup>2</sup>     | 7.75                        | 1                               | 7.75                             | 6.20                           | 0.032    | S                            |
| D <sup>2</sup>     | 0.00                        | 1                               | 0.00                             | 0.00                           | 0.9818   | NS                           |
| <b>Residual</b>    | 12.49                       | 10                              | 1.25                             |                                |          |                              |
| Lack of Fit        | 11.90                       | 8                               | 1.49                             | 5.05                           | 0.1759   | NS                           |
| Pure Error         | 0.59                        | 2                               | 0.29                             |                                |          |                              |
| <b>Cor Total</b>   | 546.51                      | 24                              |                                  |                                |          |                              |
| <b>CV = 1.26 %</b> | <b>R<sup>2</sup> = 0.98</b> | <b>Adj R<sup>2</sup> = 0.94</b> | <b>Pred R<sup>2</sup> = 0.81</b> | <b>Adeq. Precision = 23.06</b> |          |                              |

\*S-Significant; NS-Non-significant

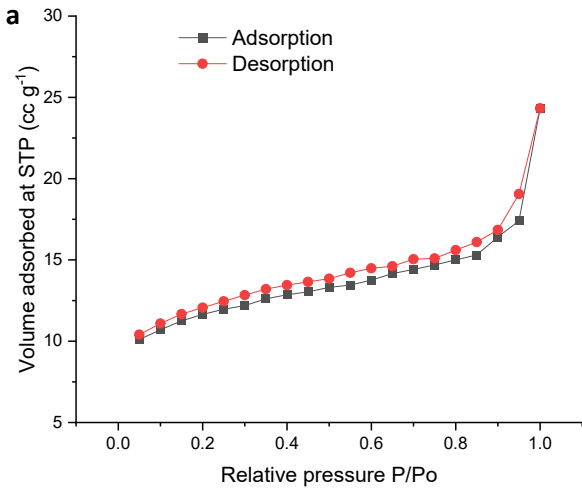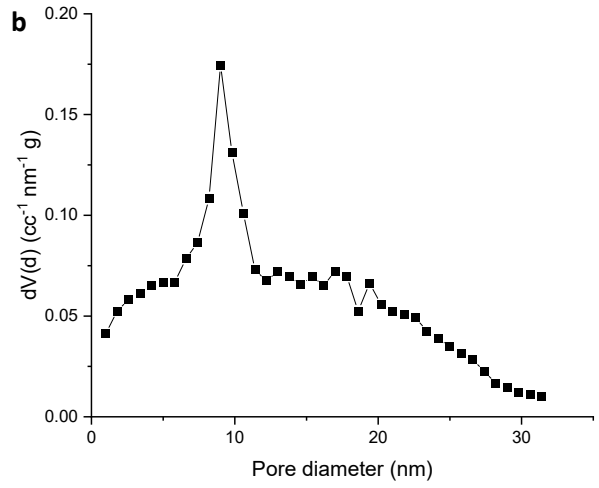

**Supplementary Figure 1.** (a) BET nitrogen adsorption isotherm plot (b) Pore size distribution plot

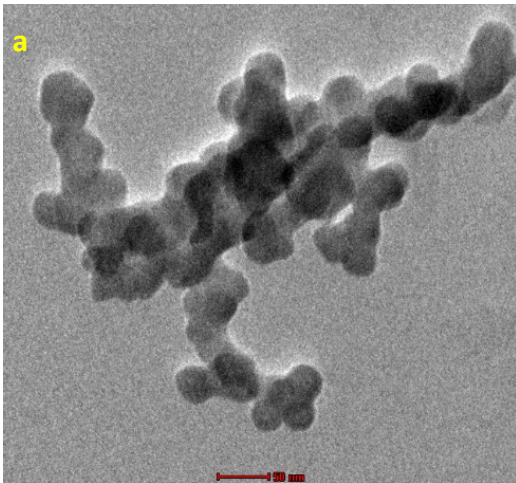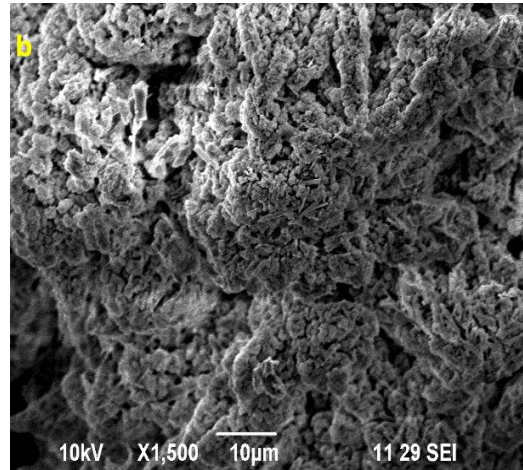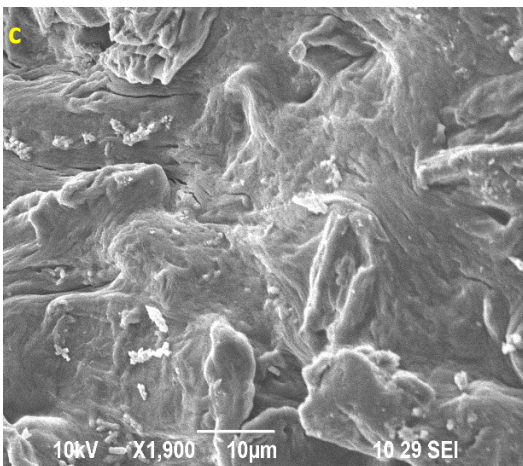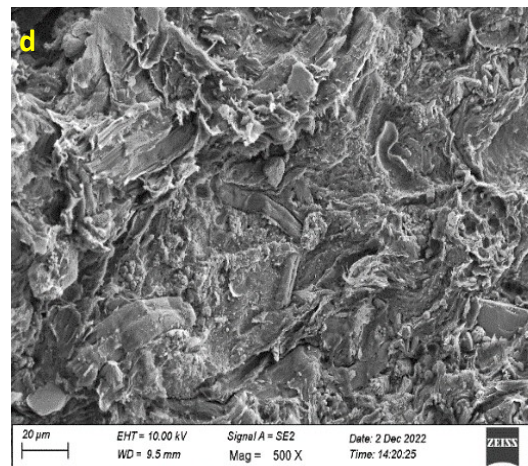

**Supplementary Figure 2.** (a) TEM micrograph of NCC and SEM micrographs of NCC-CH hydrogel bead (b) before adsorption (c and d) after adsorption.

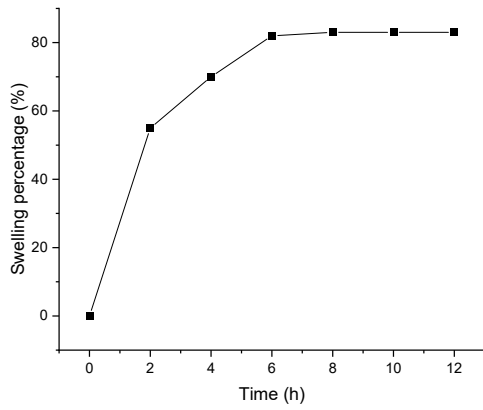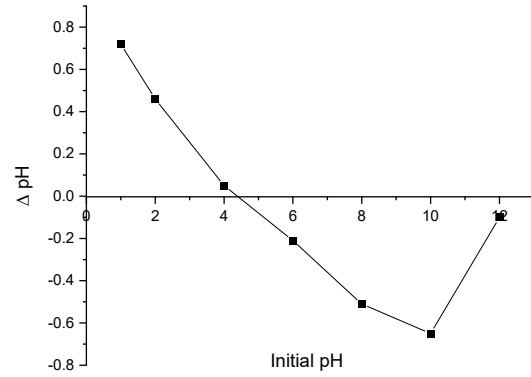

**Supplementary Figure 3.** (a) Point of zero charge and (b) Swelling ratio of NCC-CH hydrogel bead.

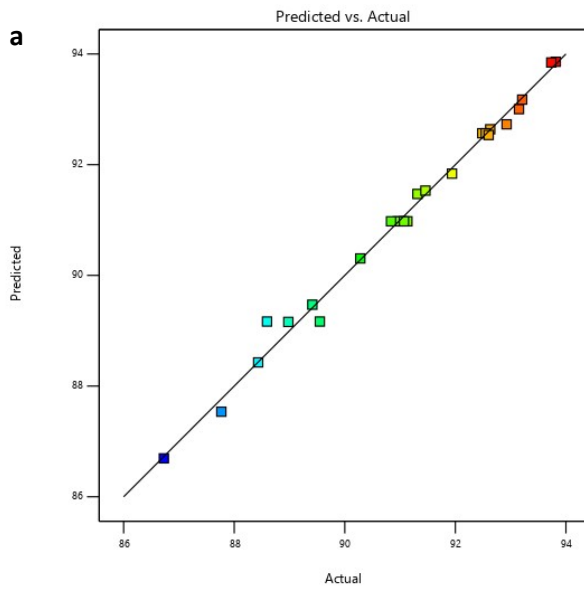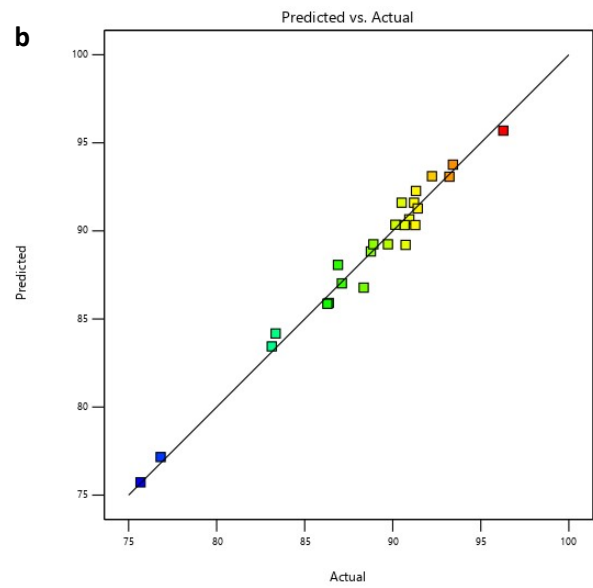

**Supplementary Figure 4.** Predicted vs Experimental plots (a) CV removal and (b) MB removal

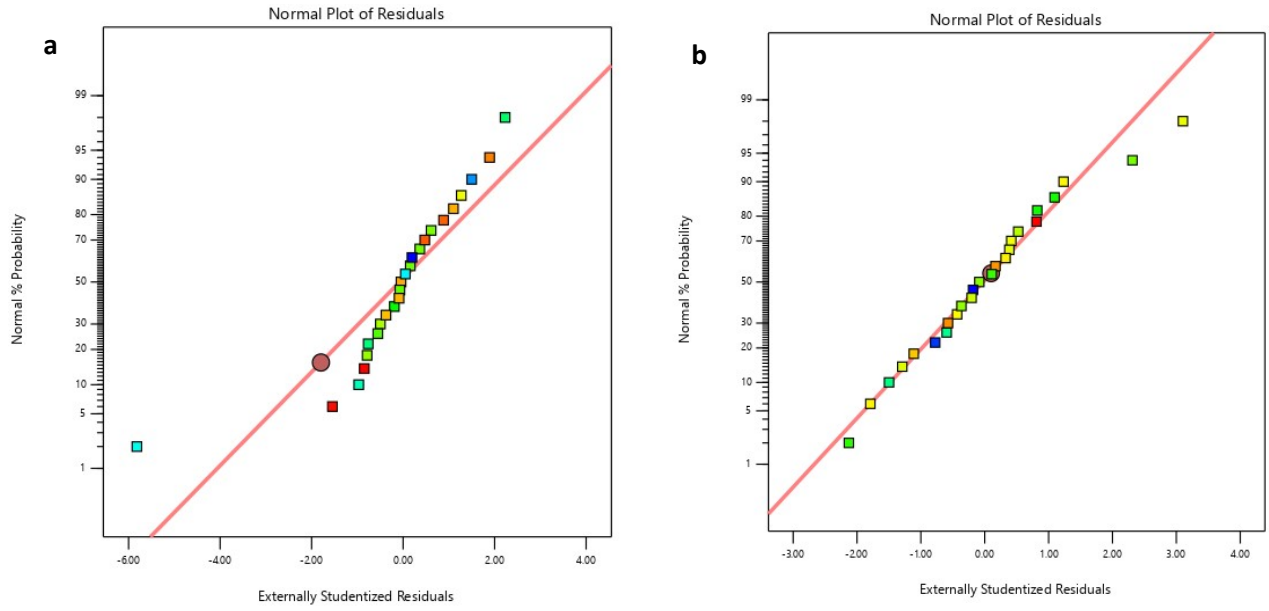

Supplementary Figure 5. Normal plot of residuals (a) CV removal and (b) MB removal

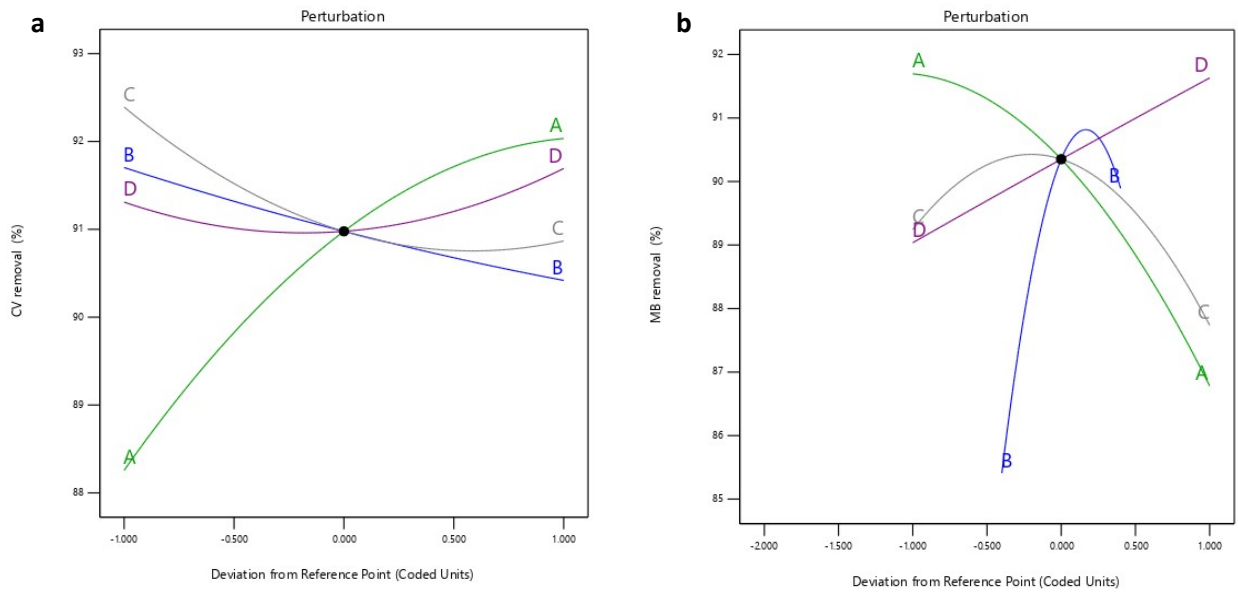

Supplementary Figure 6. Perturbation plot (a) CV removal and (b) MB removal

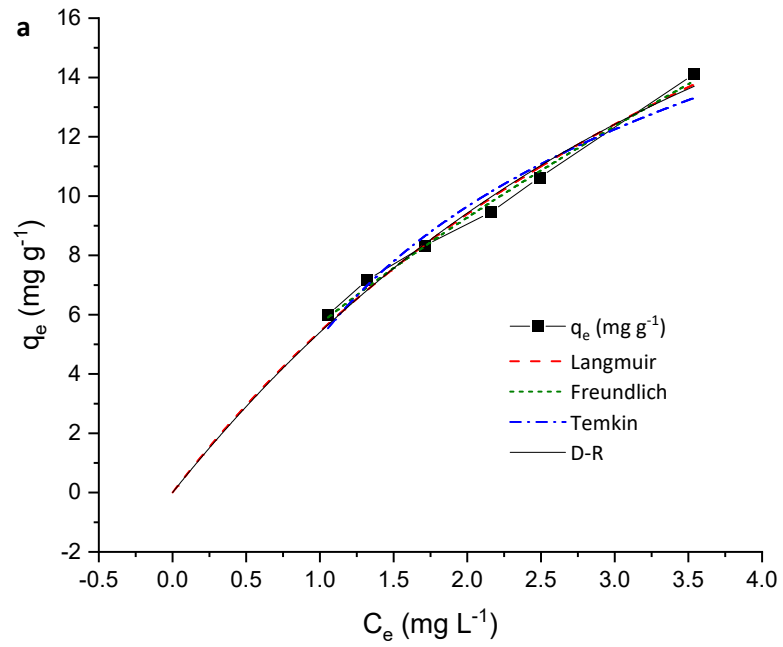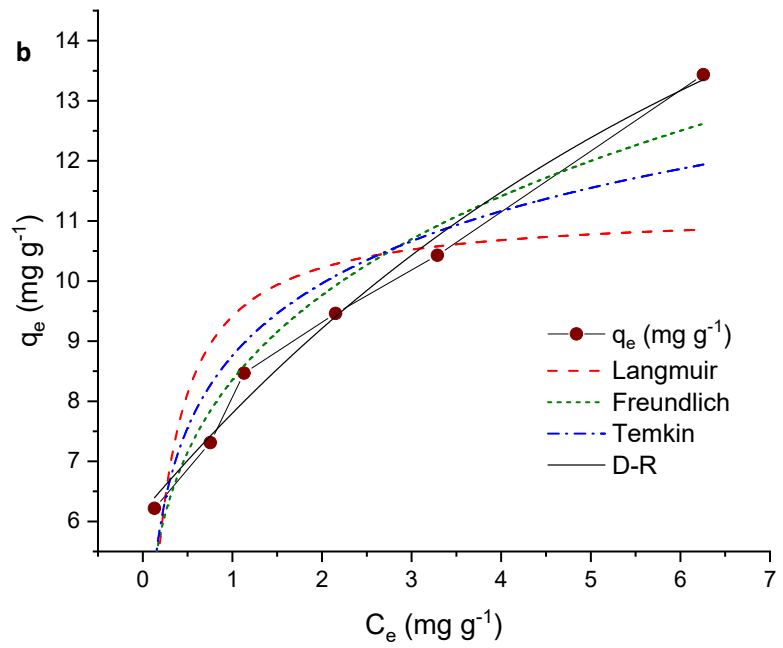

**Supplementary Figure 7.** Adsorption isotherm models for CV (a) and MB (b) removal

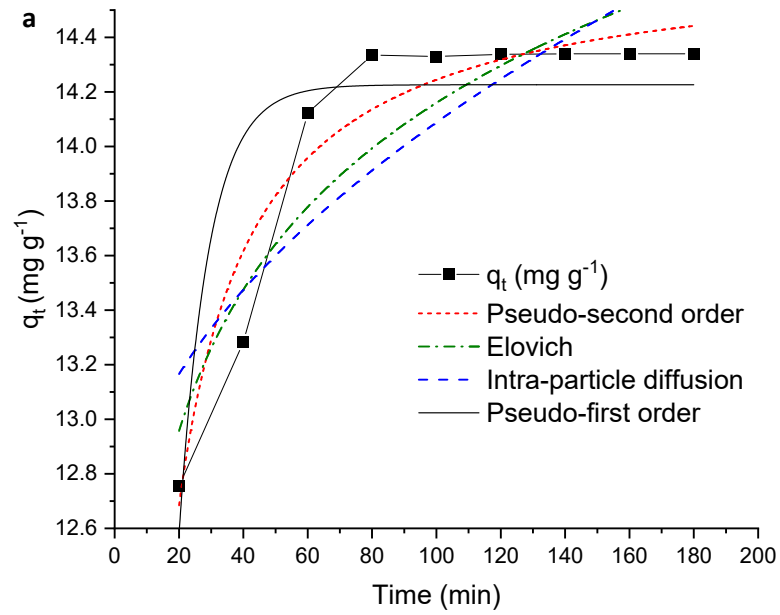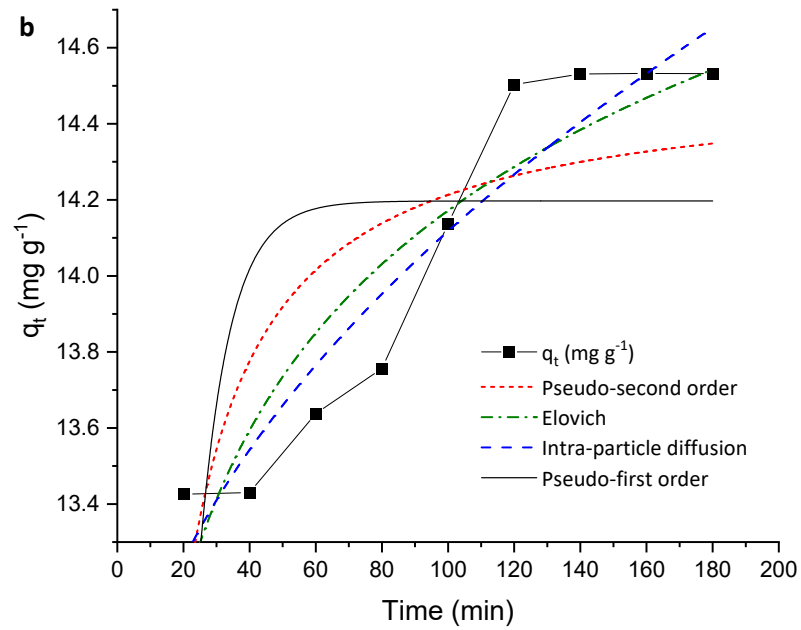

**Supplementary Figure 8.** Adsorption kinetic models for CV (a) and MB (b) removal

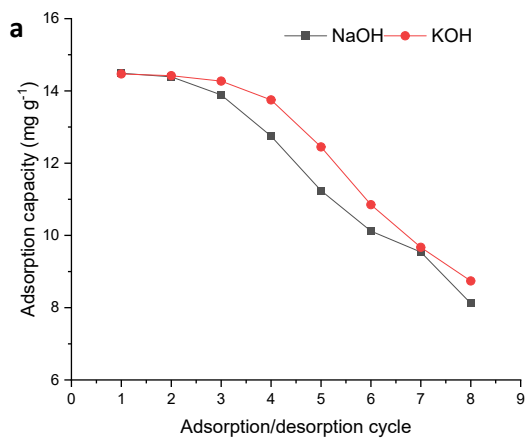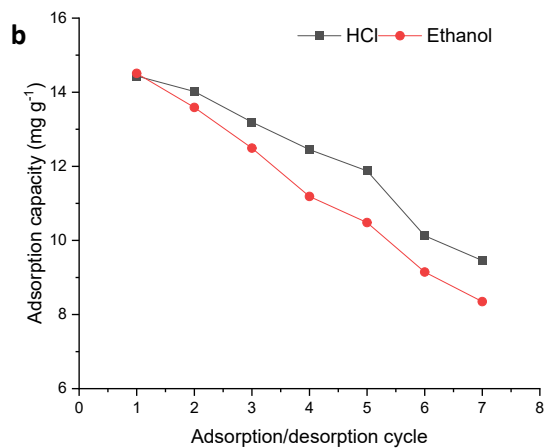

**Supplementary Figure 9.** Adsorption capacity of NCC-CH in adsorption/desorption cycles (a) CV adsorption and (b) MB adsorption
